# Supplementary material for: Systemic Injection of Oncolytic Vaccinia Virus Suppresses Primary Tumor Growth and Lung Metastasis in Metastatic Renal Cell Carcinoma by Remodeling Tumor Microenvironment
Source: MDPI journal article supplement (doi:10.3390/biomedicines10010173), 2022-01-14
Supplement: s1 [file s1]

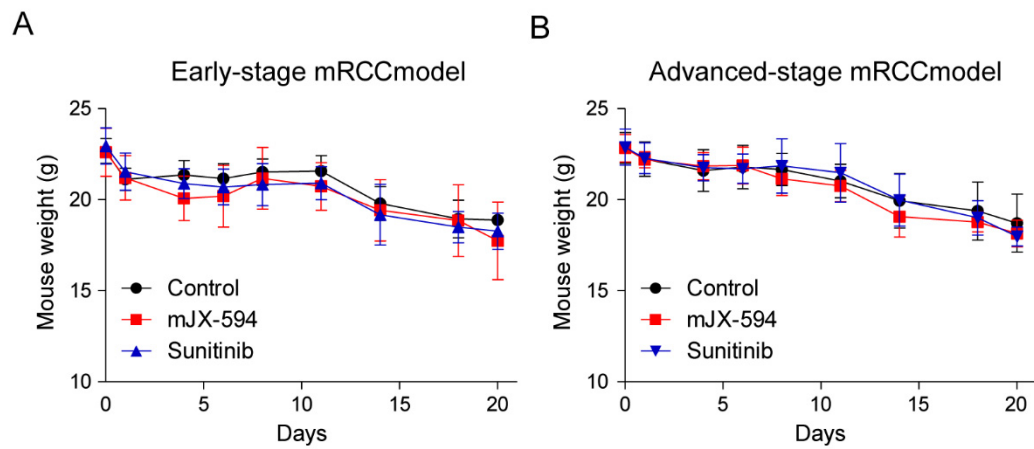

**Supplementary Figure S1.** Mice weight over time, demonstrating no significant weight loss in JX-594 or sunitinib treatment group compared with control group according to (A) early-stage metastatic renal cell carcinoma (mRCC) model and (B) advanced-stage mRCC model.

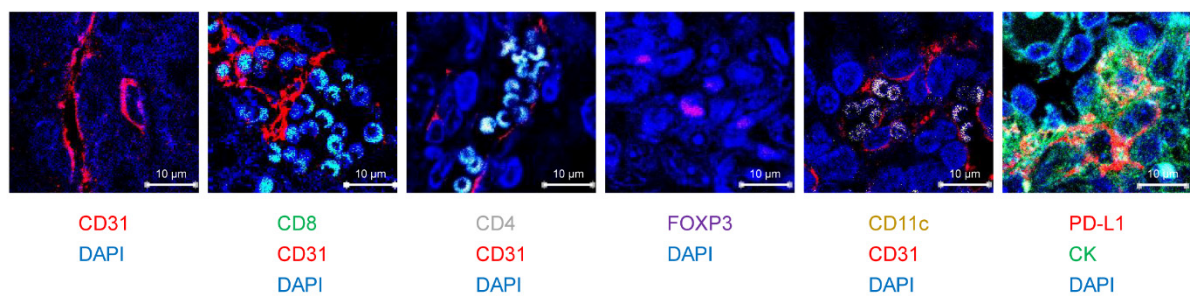

**Supplementary Figure S2.** Representative high-magnified images of lung metastatic sites treated with mJX-594 systemic treatment. Tumor sections were stained for CD31, CD8, CD4, CD11c, Foxp3, and PD-L1. Scale bars, 10 µm.

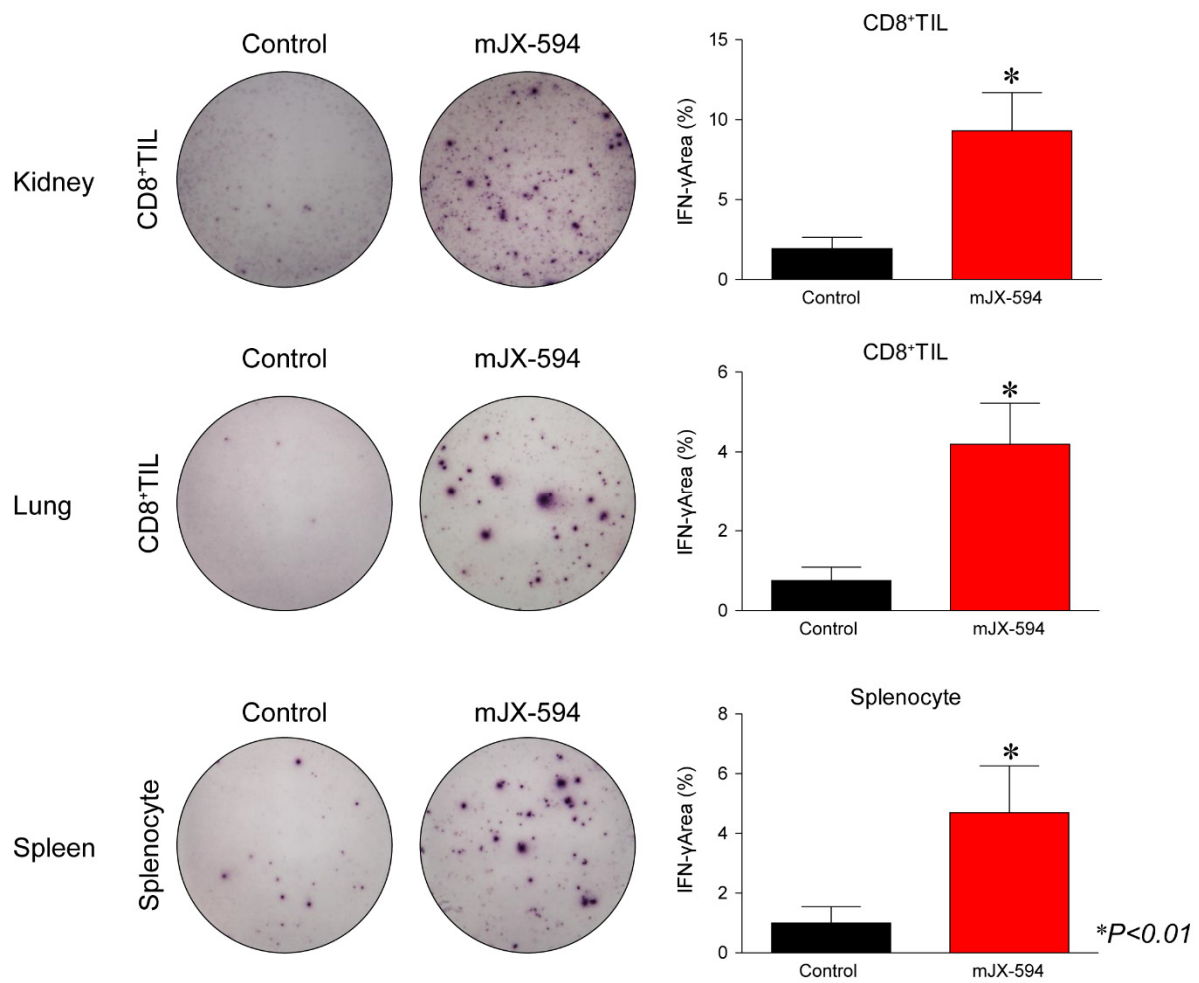

**Supplementary Figure S3.** Images and comparisons of IFN $\gamma$  ELISPOT in CD8<sup>+</sup> tumor infiltrating lymphocytes (TILs) and splenocytes from control or JX-594 treated mice. CD8<sup>+</sup> TILs were isolated from dissociated tumors with anti-CD8 antibody-coated magnetic beads. \*  $P < 0.01$
